# Supplementary material for: Delayed vaccine-induced CD8+ T cell expansion by topoisomerase I inhibition mediates enhanced CD70-dependent tumor eradication
Source: PubMed Central journal article supplement — J Immunother Cancer. 2023 Nov 29;11(11):e007158. doi: 10.1136/jitc-2023-007158 (PMC10689370; doi:10.1136/jitc-2023-007158), 2023-11-29
Supplement: jitc-2023-007158supp001.pdf [file jitc-2023-007158supp001.pdf]

Supplementary Figure 1 van der Sluis, *et al*

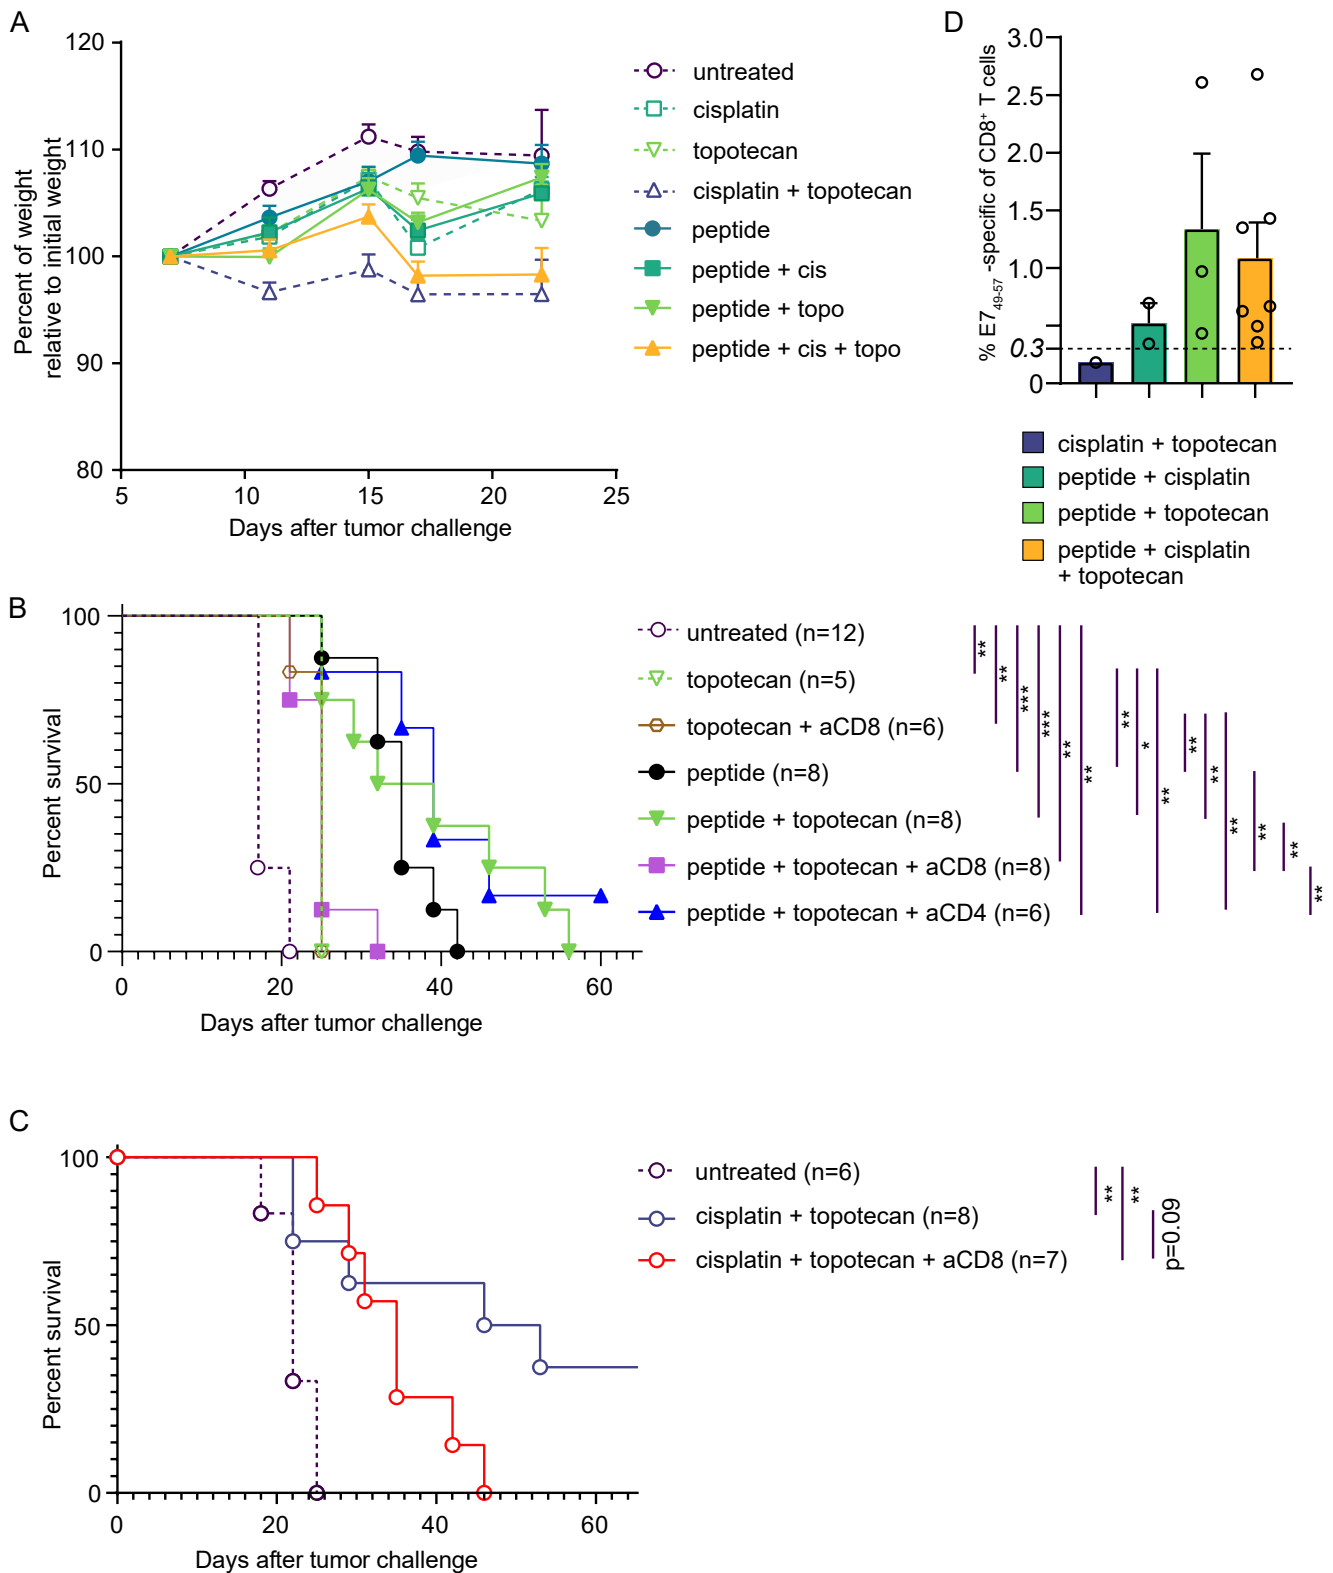

**Supplemental Figure 1. CD8<sup>+</sup> T cells are pivotal for vaccination and chemotherapy-mediated anti-tumor responses.**

(A-D) The scheme of the experiment is shown in Figure 1A. (A) Relative body weight in time. (B,C) Kaplan–Meier survival plots. CD8 or CD4 depleting antibodies were provided from day 7 onward. Number of mice is indicated. (D) % E7<sub>49-57</sub>-specific of CD8<sup>+</sup> T cells on day 130. Dotted line indicates 0.3%, previously shown to protect against TC-1 tumor outgrowth. \*p<0.05, \*\*p<0.01, \*\*\*p<0.001.

Supplementary Figure 2 van der Sluis, *et al*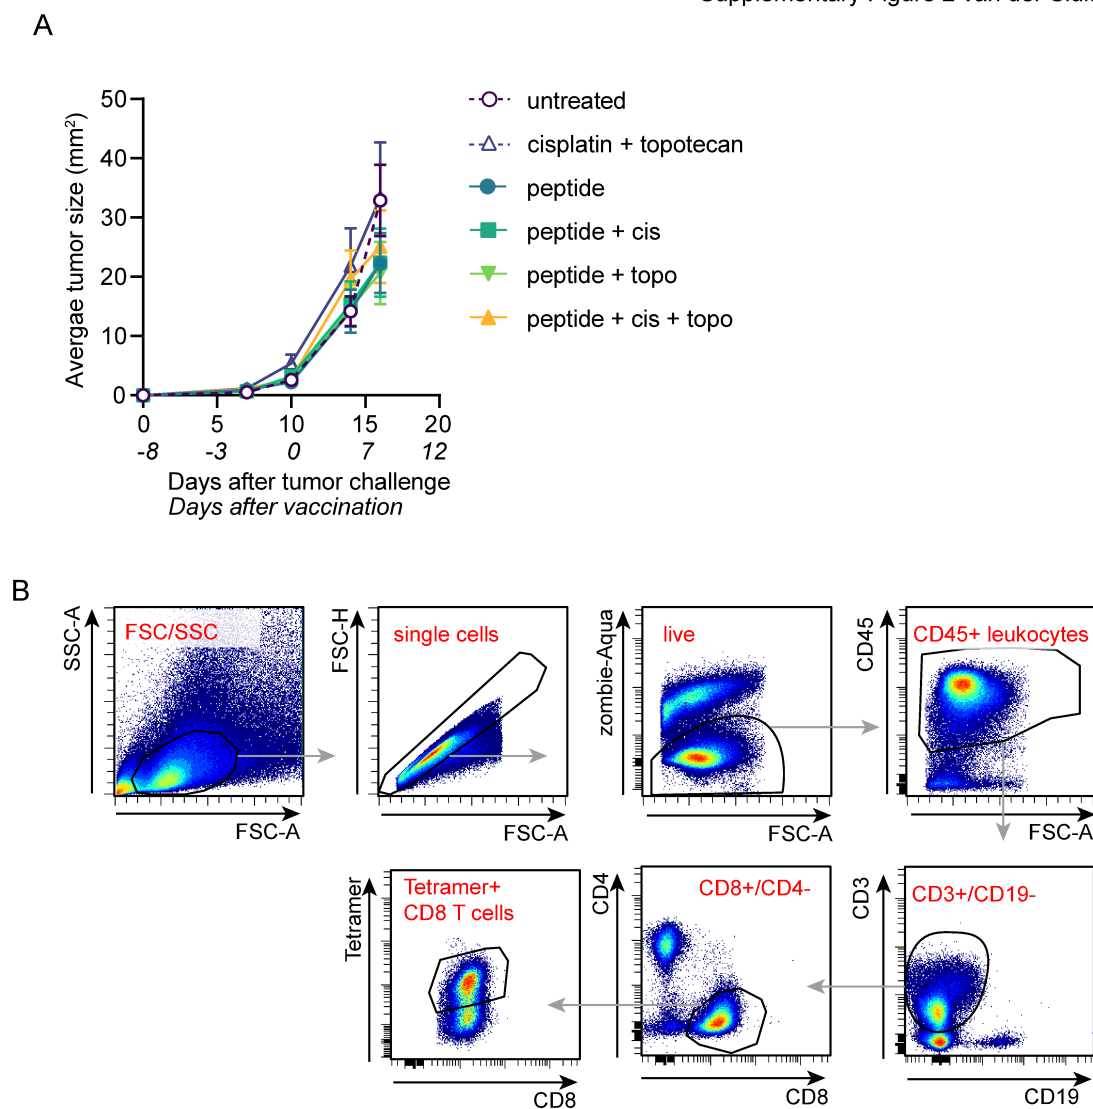

**Supplemental Figure 2. Tumor growth and gating strategy.** (A) The scheme of the experiment is shown in Figure 2A. Shown is the tumorsize in square millimeter. Days after tumor challenge is indicated in regular font while days after vaccination are indicated in italics. Data shown is representative for 5 individual experiments. (B) Gating strategy for MHC class I tetramer positive CD8<sup>+</sup> T cells. Starting in the upper left corner, leukocytes cells were selected using a wide FSC/SSC gate. From this single cells were selected followed by live cells and CD45<sup>+</sup> leukocytes gating. Next, cells were gated on CD3<sup>+</sup> and CD19<sup>-</sup> followed by CD8<sup>+</sup> and CD4<sup>-</sup> gating. Finally, the E7<sub>49-57</sub>-specific CD8<sup>+</sup> T cells were identified using HPV16 E7<sub>49-57</sub> peptide (RAHYNIVTF) loaded H-2Db tetramers.

Supplementary Figure 3 van der Sluis, *et al.*

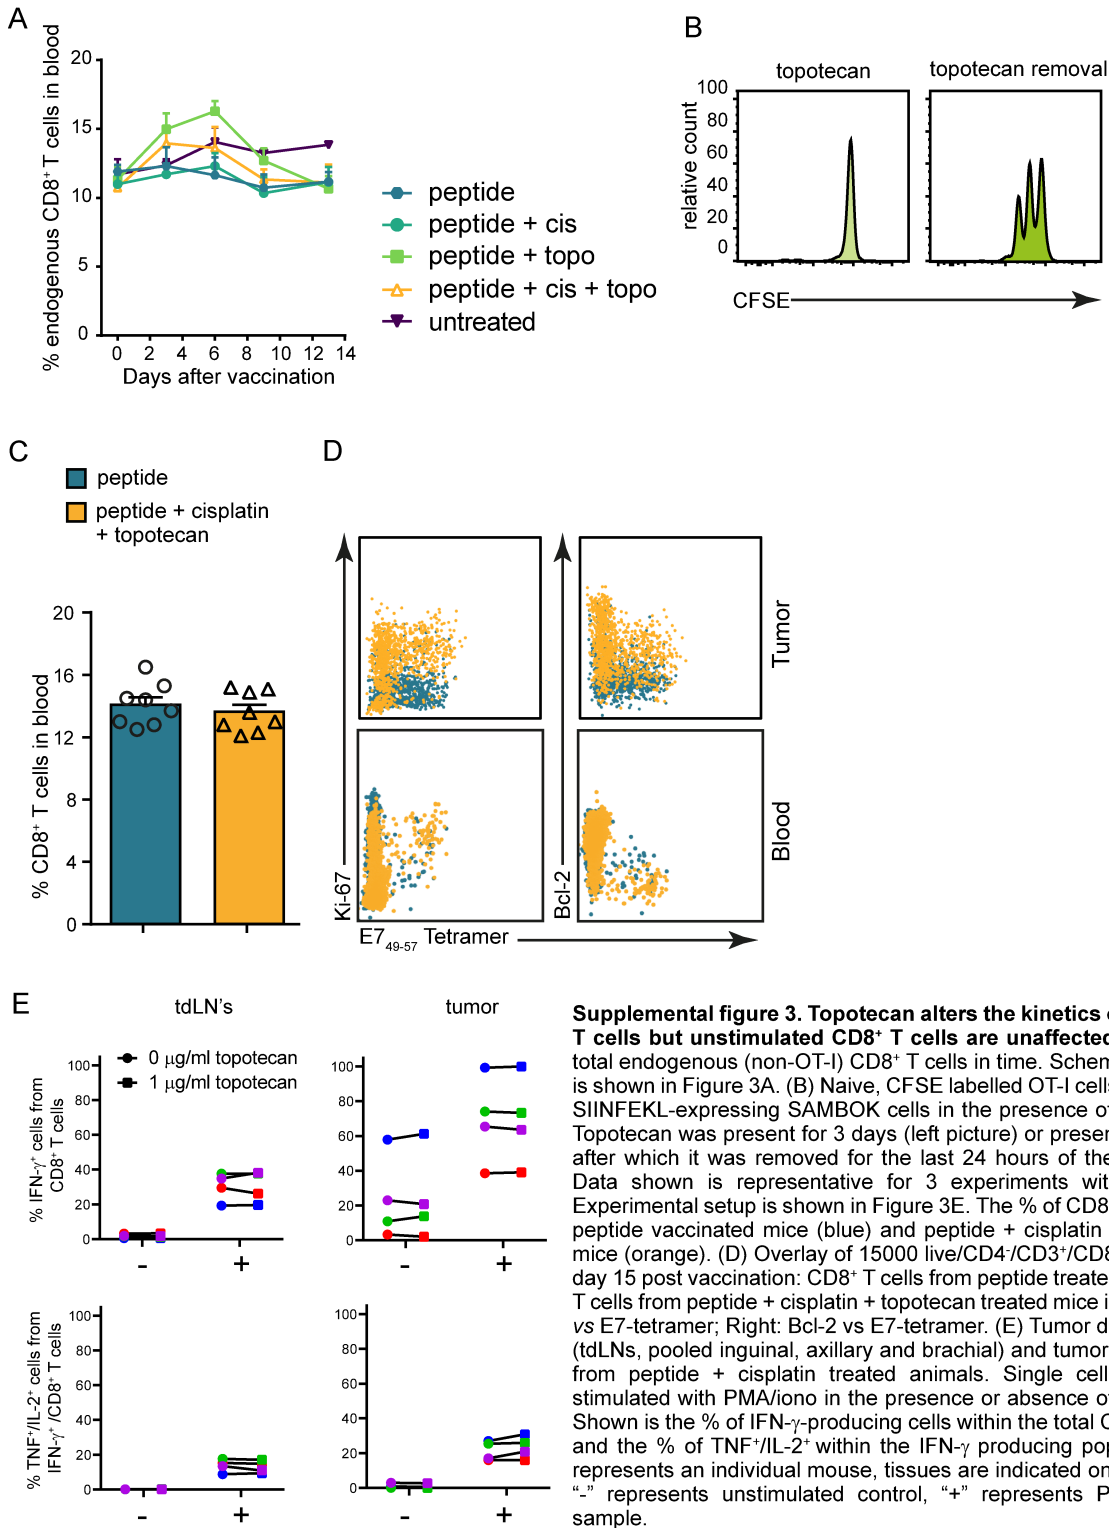

**Supplemental figure 3. Topotecan alters the kinetics of vaccine-induced T cells but unstimulated CD8<sup>+</sup> T cells are unaffected.** (A) Percentage of total endogenous (non-OT-I) CD8<sup>+</sup> T cells in time. Scheme of the experiment is shown in Figure 3A. (B) Naive, CFSE labelled OT-I cells were stimulated by SIINFEKL-expressing SAMBOK cells in the presence of 1  $\mu$ g/ml topotecan. Topotecan was present for 3 days (left picture) or present for the first 2 days after which it was removed for the last 24 hours of the experiment (right). Data shown is representative for 3 experiments with similar data. (C) Experimental setup is shown in Figure 3E. The % of CD8<sup>+</sup> T cells is shown for peptide vaccinated mice (blue) and peptide + cisplatin + topotecan treated mice (orange). (D) Overlay of 15000 live/CD4<sup>+</sup>/CD3<sup>+</sup>/CD8<sup>+</sup> cells per group on day 15 post vaccination: CD8<sup>+</sup> T cells from peptide treated mice in blue, CD8<sup>+</sup> T cells from peptide + cisplatin + topotecan treated mice in orange. Left: Ki-67 vs E7-tetramer; Right: Bcl-2 vs E7-tetramer. (E) Tumor draining lymph nodes (tdLNs, pooled inguinal, axillary and brachial) and tumors (C3) were isolated from peptide + cisplatin treated animals. Single cell suspensions were stimulated with PMA/iono in the presence or absence of 1  $\mu$ g/ml topotecan. Shown is the % of IFN- $\gamma$ -producing cells within the total CD8<sup>+</sup> T cell pool (top) and the % of TNF<sup>+</sup>/IL-2<sup>+</sup> within the IFN- $\gamma$  producing population. Each color represents an individual mouse, tissues are indicated on top of the columns. "-" represents unstimulated control, "+" represents PMA/iono stimulated sample.

Supplementary Figure 4 van der Sluis, et al.

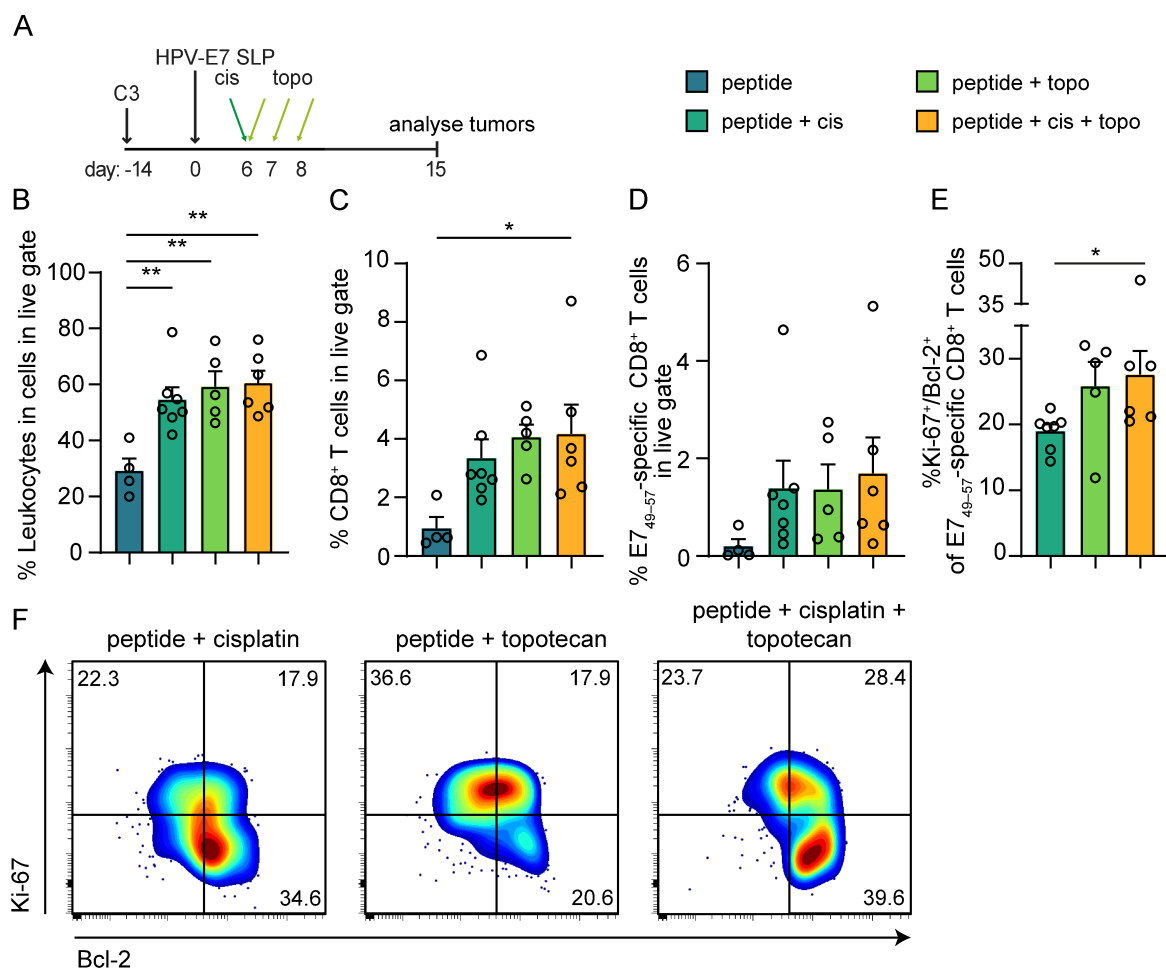

**Supplemental Figure 4. Immune infiltration of C3 tumors.** (A) Scheme of the experiment. (B-D) Percentage of (B) leukocytes, (C) CD8<sup>+</sup> T cells, (D) E7<sub>49-57</sub>-specific CD8<sup>+</sup> T cells within the live gate. (E) Percentage of Ki-67<sup>+</sup>/Bcl-2<sup>+</sup> cells of E7<sub>49-57</sub>-specific CD8<sup>+</sup> T cells (upper right quadrant in (F)). Shown are bars and individual values. Data is represented as mean + SEM and analysed by a one-way ANOVA. (F) Flow cytometry plots showing Ki-67 vs Bcl-2 for E7<sub>49-57</sub>-specific CD8<sup>+</sup> T cells. Shown is an overlay of 500 cells per treatment group, equally divided over the individual samples.

Supplementary Figure 5 van der Sluis, *et al.*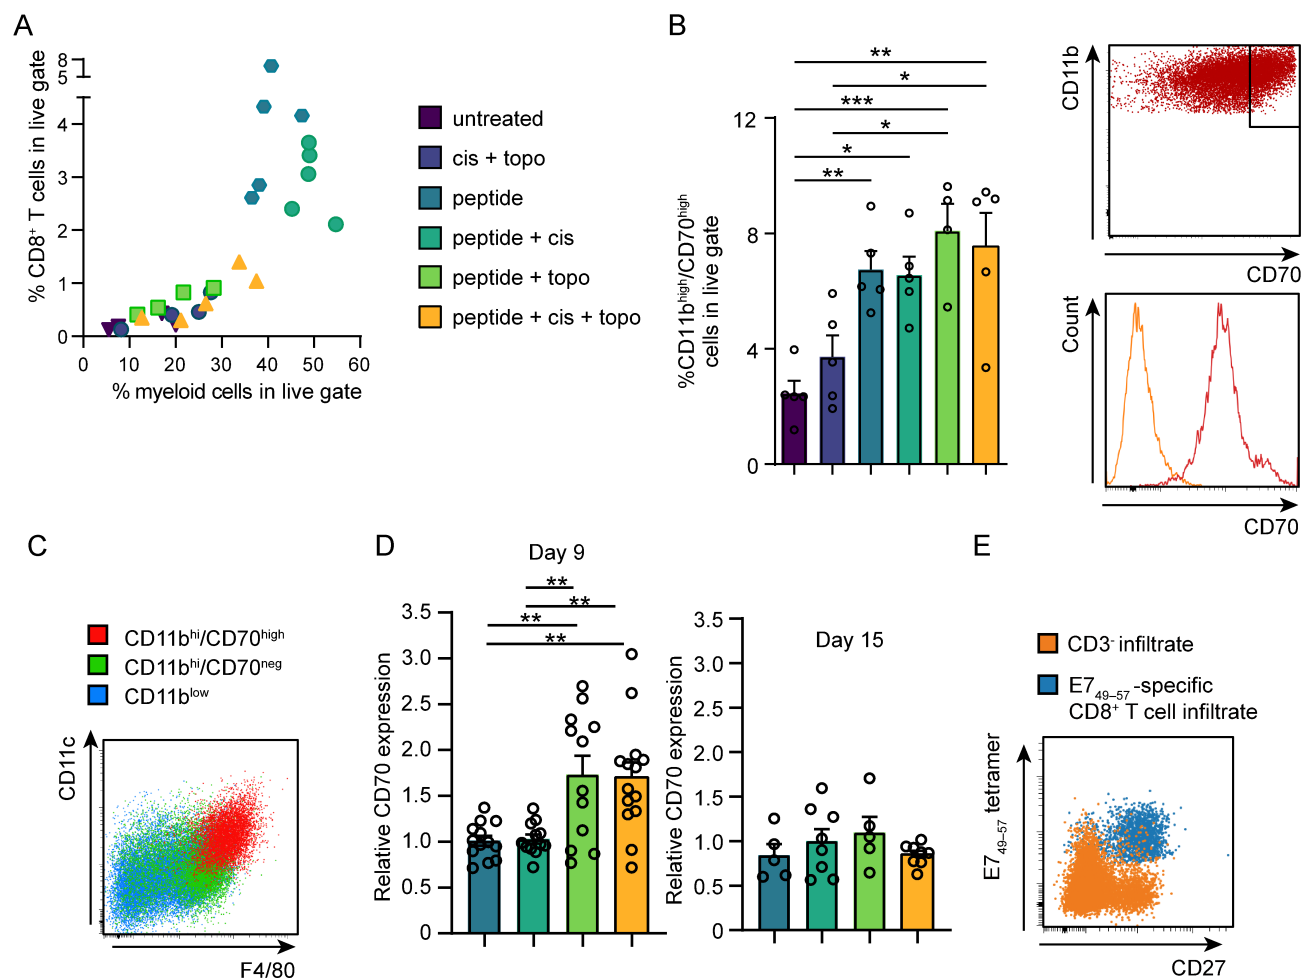

**Supplemental Figure 5. CD70 is highly expressed on myeloid cells after topotecan treatment.** (A) Correlation between the percentage of CD8<sup>+</sup> T cells (vertical axis) and total CD11b<sup>+</sup> (horizontal axis) in the live gate. Underlying data is obtained from Figure 2E and 5A. (B) CD11b<sup>hi</sup> cells/CD70<sup>hi</sup> cells out of total amount of live cells. Bar graphs (mean + SEM) with individual values overlaid. \**p*<0.05, \*\**p*<0.01, \*\*\**p*<0.001. Right top; gating strategy, right bottom; anti-CD70 staining (red) and corresponding staining with isotype control (orange). (C) Dotplot indicating CD11c versus F4/80 expression. The three immune cell subsets CD11b<sup>hi</sup>/CD70<sup>high</sup>, CD11b<sup>hi</sup>/CD70<sup>neg</sup>, and CD11b<sup>low</sup> cells are resp. indicated by red, green and blue. Data shown in A-C are representative of 2 independent experiments. (D) CD70 expression from n=3 (day 9) and n=2 (day 15) experiments, each with 2-6 animals per group. Circles represent individual mice. For each experiment the individual values were normalized against the average of the peptide + cisplatin group. (E) Representative flow cytometry plot indicates CD27 expression versus E7<sub>49-57</sub>-tetramer binding on CD3<sup>-</sup> cells (orange) and E7<sub>49-57</sub>-specific CD8<sup>+</sup> T cell (blue) in the TME of multiple mice. B and D are analyzed by an ordinary one-way ANOVA test. Data shown as mean + SEM, \**p*<0.05, \*\**p*<0.01, \*\*\**p*<0.001.

| Antibody target, Clone and fluorochrome    | Company        | Identifier                      |
|--------------------------------------------|----------------|---------------------------------|
| CD3 (Clone 500A2), V500                    | BD Biosciences | AB_1937314                      |
| CD3 (Clone 17A2), BV421                    | Biolegend      | AB_2562553                      |
| CD4 (Clone RM4-5), BV605                   | Biolegend      | AB_11125962                     |
| CD8 (Clone 53-6.7), APC-R700               | BD Biosciences | AB_2739032                      |
| CD8 (Clone 53-6.7), BVU395                 | BD Biosciences | AB_2732919                      |
| CD11b (Clone M1/70), FITC                  | Biolegend      | AB_312789                       |
| CD19 (Clone 1D3), APC                      | BD biosciences | AB_398483                       |
| CD27 (Clone LG.3A10), V450                 | BD biosciences | AB_10611853                     |
| CD45 (Clone 30-F11), APC-fire810           | Biolegend      | AB_2860600                      |
| CD45.2 (Clone 104), APC-eF780              | Thermo Fisher  | AB_1272175                      |
| CD70, (Clone FR70), Biotin                 | Biolegend      | AB_313116                       |
| CD70, (Clone FR70), Pe-Cy7                 | Biolegend      | AB_2750467                      |
| CD86, (Clone GL1), APC                     | Thermo Fisher  | AB_469419                       |
| CD90.1 (Clone OX-7), PerCP                 | BD biosciences | AB_396611                       |
| Class II (Clone M5/114.15.2), V500         | BD biosciences | AB_11153488                     |
| IFN-gamma (Clone XMG1.2), APC              | Thermo Fisher  | AB_469504                       |
| TNF-alpha (Clone MP6-XT22), Fitc           | Biolegend      | AB_315425                       |
| IL-2 (Clone JES6-5H4), Pe                  | Thermo Fisher  | AB_466150                       |
| KLRG1 (Clone 2F1), PeCy7                   | Biolegend      | AB_2561736                      |
| Ki-67 (Clone B56) FITC                     | BD biosciences | AB_396302, set includes isotype |
| Bcl-2 (Clone 3F11) Pe                      | BD biosciences | AB_396457, set includes isotype |
| TCRVb5.1/5.2 (Clone MR9-4), Pe             | BD biosciences | AB_394698                       |
| Streptavidin BV605                         | Biolegend      | 405229                          |
| Rat IgG2b, κ Isotype Ctrl Antibody, Pe-Cy7 | Biolegend      | AB_326560                       |
